# Supplementary material
Source: MDPI journal article supplement (https://www.mdpi.com/2073-4352/9/12/627)
Supplement: s1 [file s1]

# Effect of Noncovalent Dispersion of Poly(ethylene oxide) in Columnar Polyether-Based Discotic Liquid Crystal on the Ionic Conductivity and Dynamics of Lithium Ions

Jih-Dar Hwang, Po-Ying Chen, Shang-Wu Ding\* Chi Wi Ong,\*\*

Department of Chemistry, National Sun Yat Sen University, Kaohsiung 804, Taiwan

S1 ----<sup>1</sup>H NMR of **HATN-TEG-1**

S2-----<sup>13</sup>C NMR of **HATN-TEG-1**

S3---- DSC Second and Third Run of **HATN-TEG-1** and **HATN-TEG-1**: 1.0 equiv. LiClO<sub>4</sub>

S4----- DSC Second and Third Run of **HATN-TEG-1-5%PEO** and **HATN-TEG-1-5%PEO: 1.0 equiv. LiClO<sub>4</sub>**

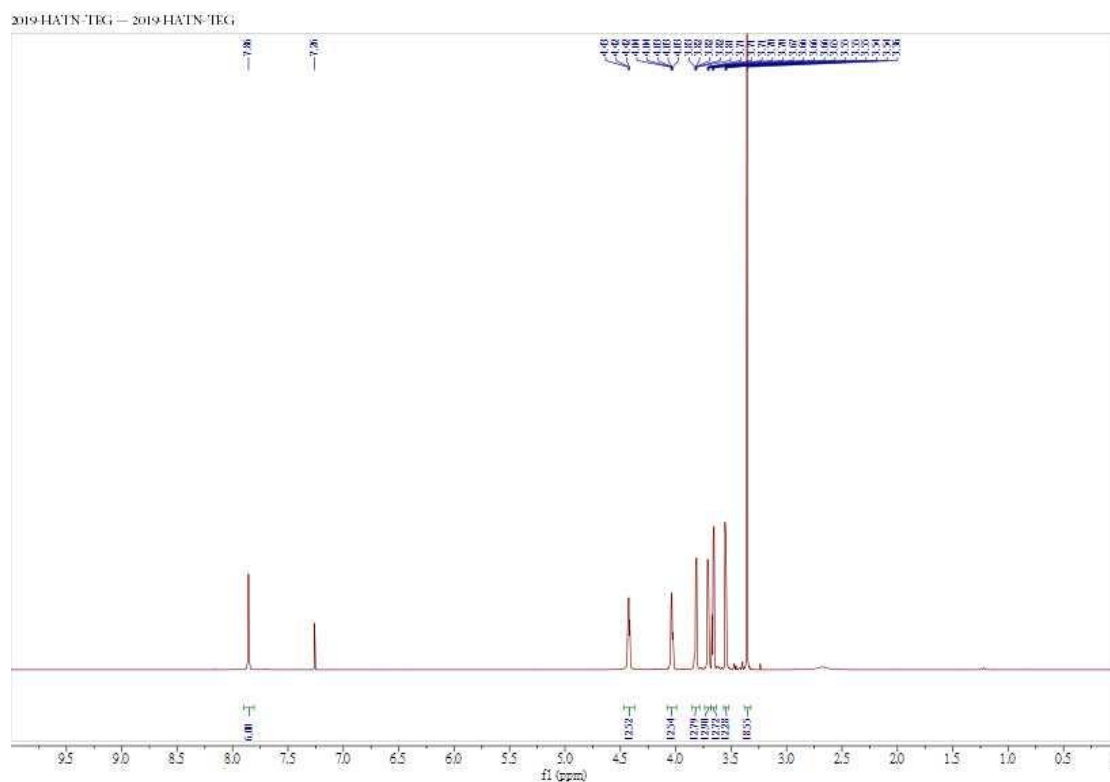<sup>1</sup>H NMR of **HATN-TEG-1** in CDCl<sub>3</sub>

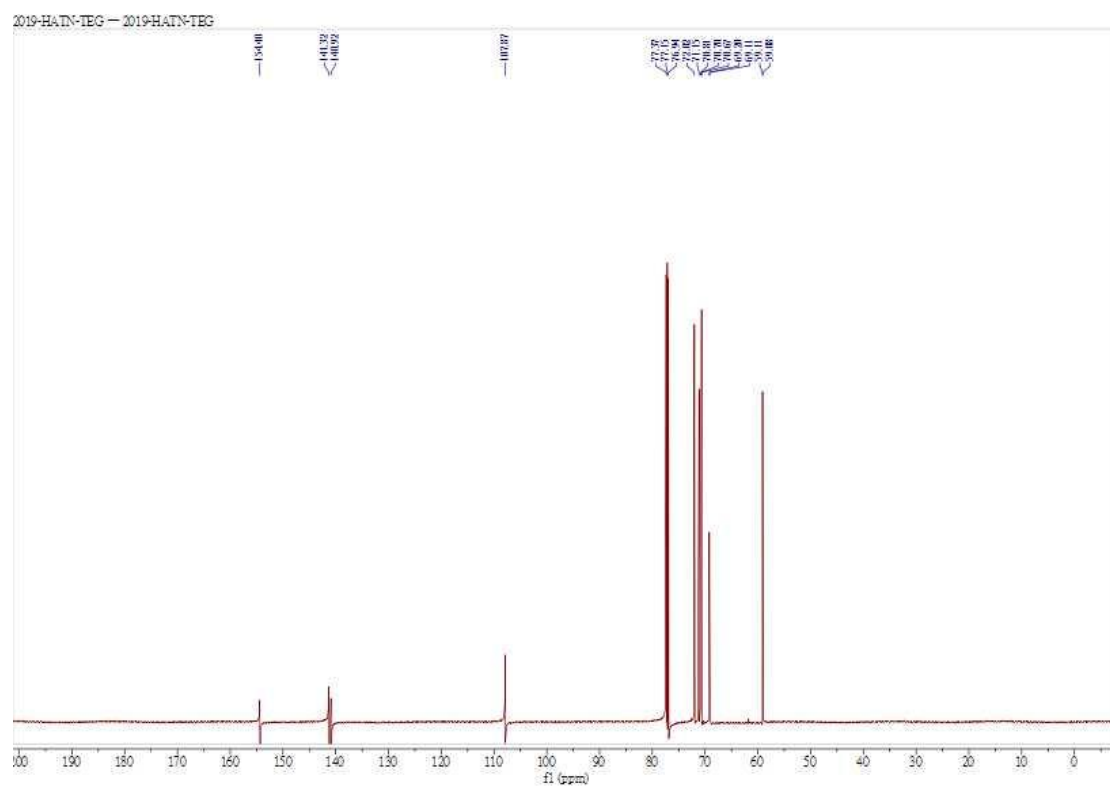

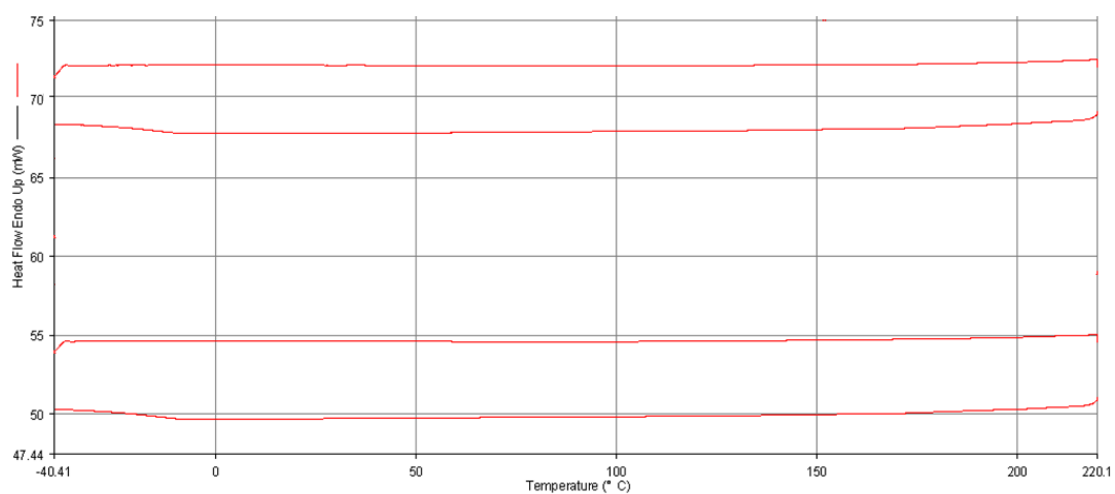

DSC -Second and Third run for **HATN-TEG-1**

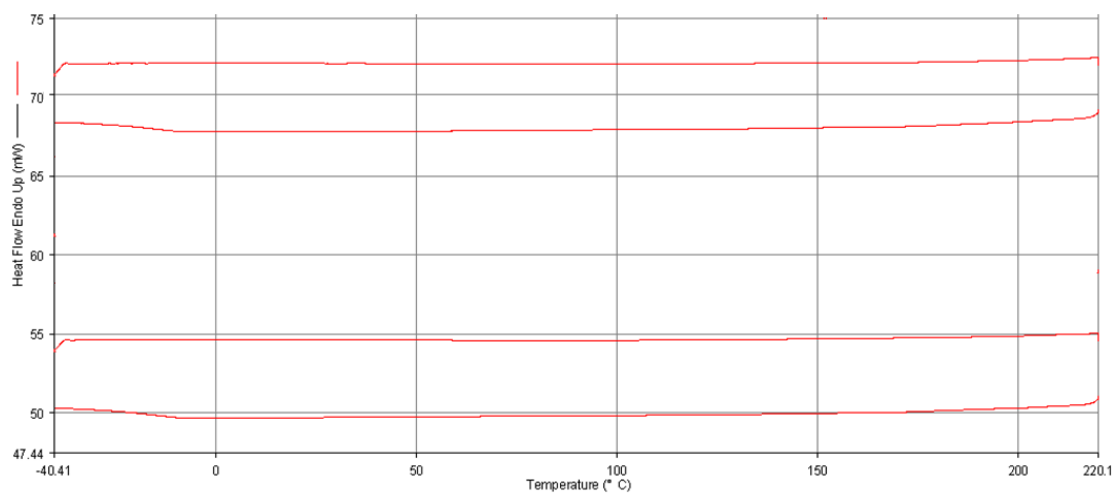

DSC -Second and Third run for **HATN-TEG-1** and 1.0 equivalent  $\text{LiClO}_4$

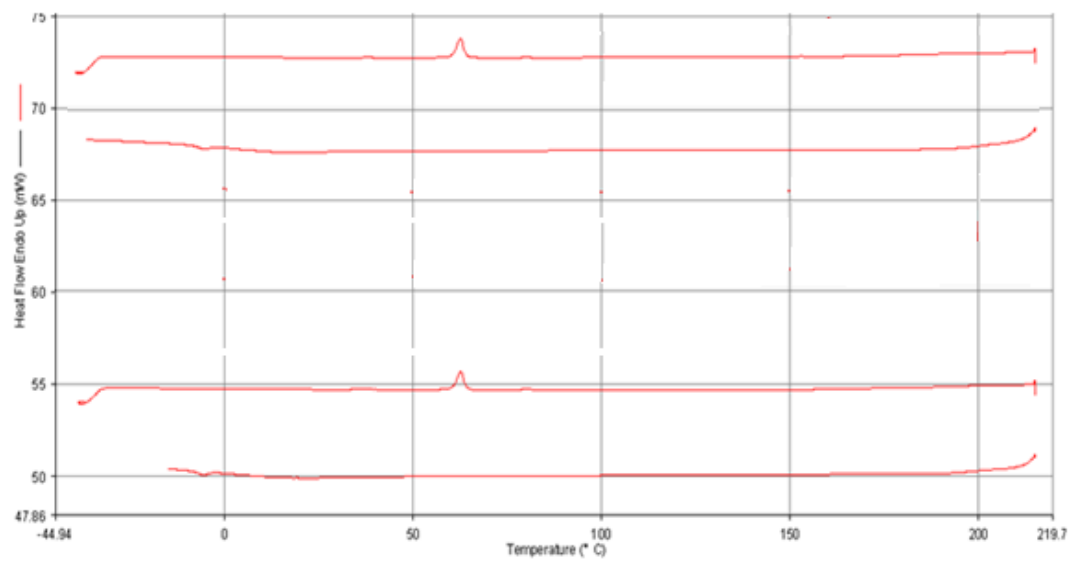

DSC -Second and Third run fo **HATH-TEG-1 - 5%PEO-8000**

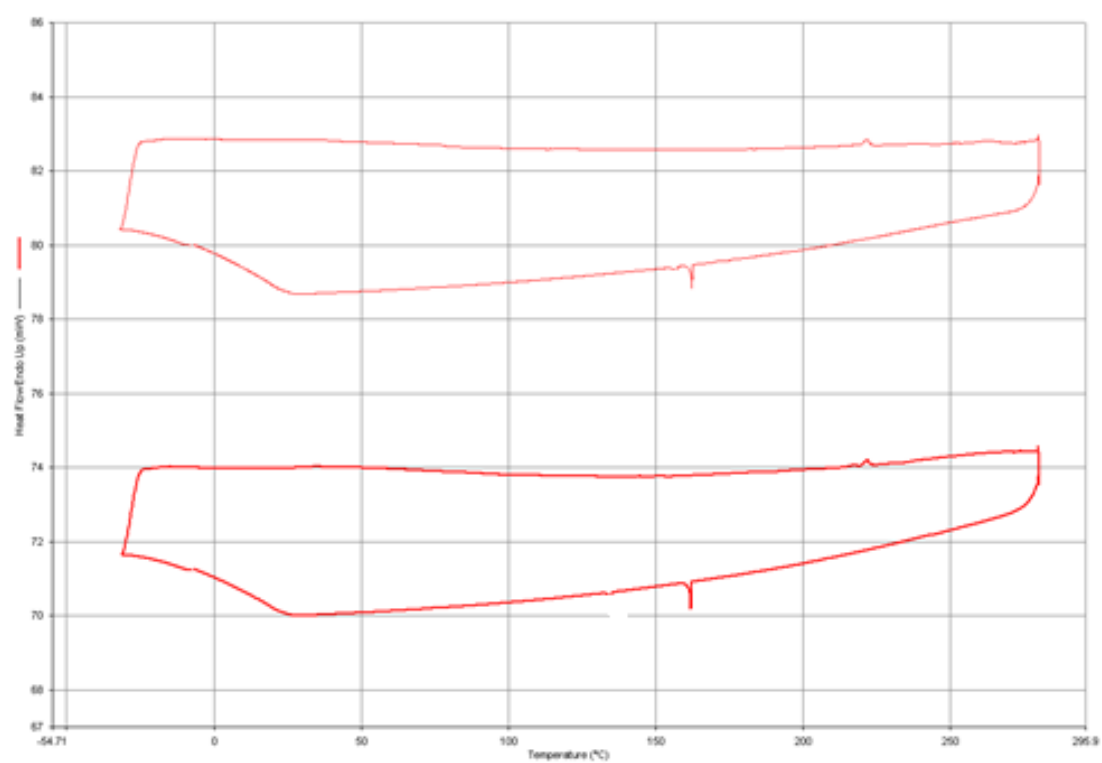

DSC -Second and Third run fo **HATH-TEG-1 - 5%PEO-8000**
